# Supplementary material for: Photoluminescent polyphosphazene nanoparticles for in situ simvastatin delivery for improving the osteocompatibility of BMSCs
Source: Royal Society of Chemistry journal article supplement (doi:10.1039/c7tb02281f), 2017-01-01
Supplement: c7tb02281f1.pdf [file c7tb02281f1.pdf]

## Supplementary Information

### Photoluminescent Polyphosphazene Nanoparticles for in situ Simvastatin Delivery to Improve Osteocompatibility of BMSCs

Zhao-Hui Huang,<sup>a</sup> Peng-Fei Wei,<sup>a</sup> Le Jin,<sup>a</sup> Xiao-Qing Hu,<sup>b</sup> Qing Cai<sup>\*a</sup> and Xiao-Ping Yang<sup>\*a</sup>

<sup>a</sup> State Key Laboratory of Organic-Inorganic Composites; Beijing Laboratory of Biomedical Materials; Beijing University of Chemical Technology, Beijing 100029, P.R. China.

<sup>b</sup> Institute of Sports Medicine, Beijing Key Laboratory of Sports Injury, Peking University Third Hospital, Beijing 100191, P. R. China

\* Corresponding to:

Prof. Qing Cai, Tel and Fax: (86)-10-64412084; E-mail: caiqing@mail.buct.edu.cn (Q.Cai)

Prof. Xiaoping Yang, Tel and Fax: (86)-10-64412084; E-mail: yangxp@mail.buct.edu.cn (X.P.Yang)

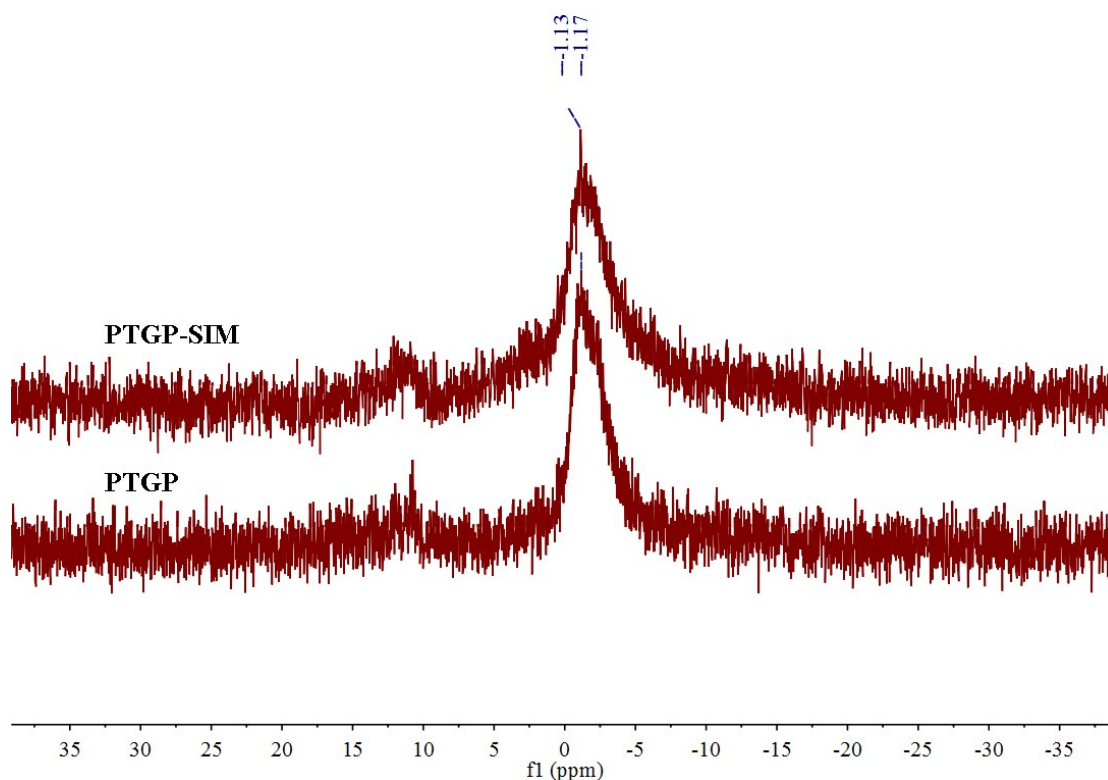

**Fig. S1.** <sup>31</sup>P NMR spectra of PTGP-SIM and PTGP polymers.

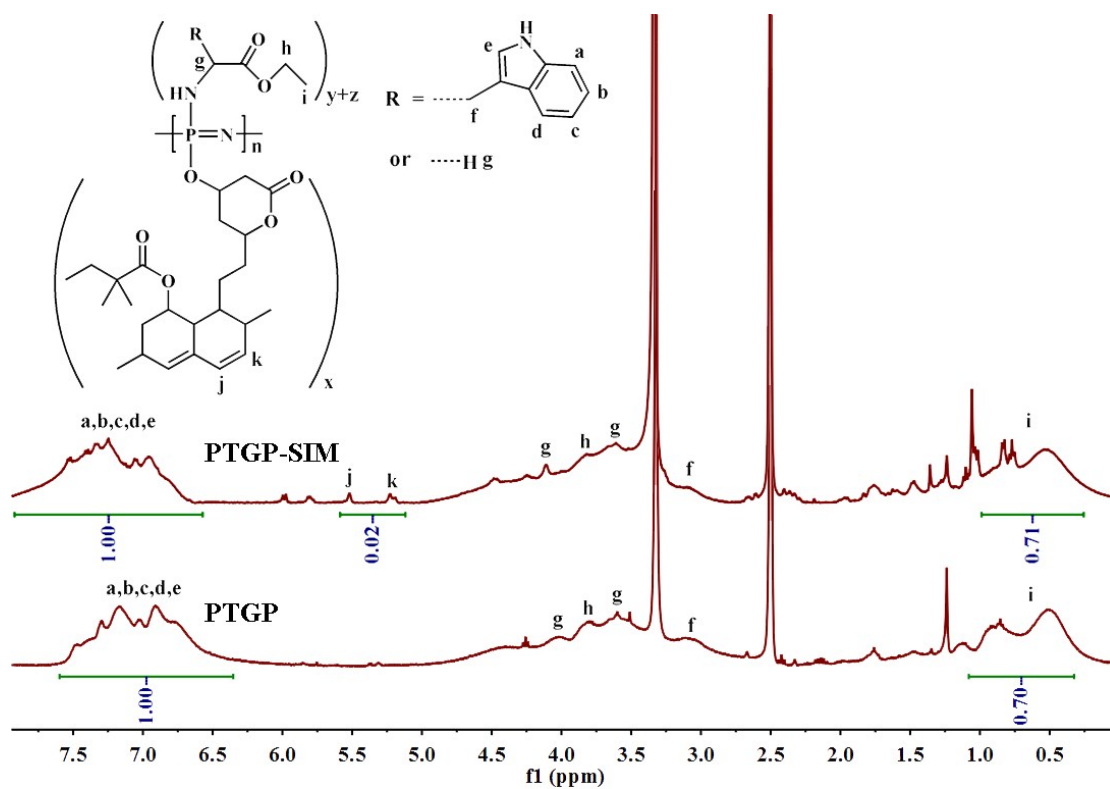

**Fig. S2.**  $^1\text{H}$  NMR spectra of PTGP-SIM and PTGP polymers.

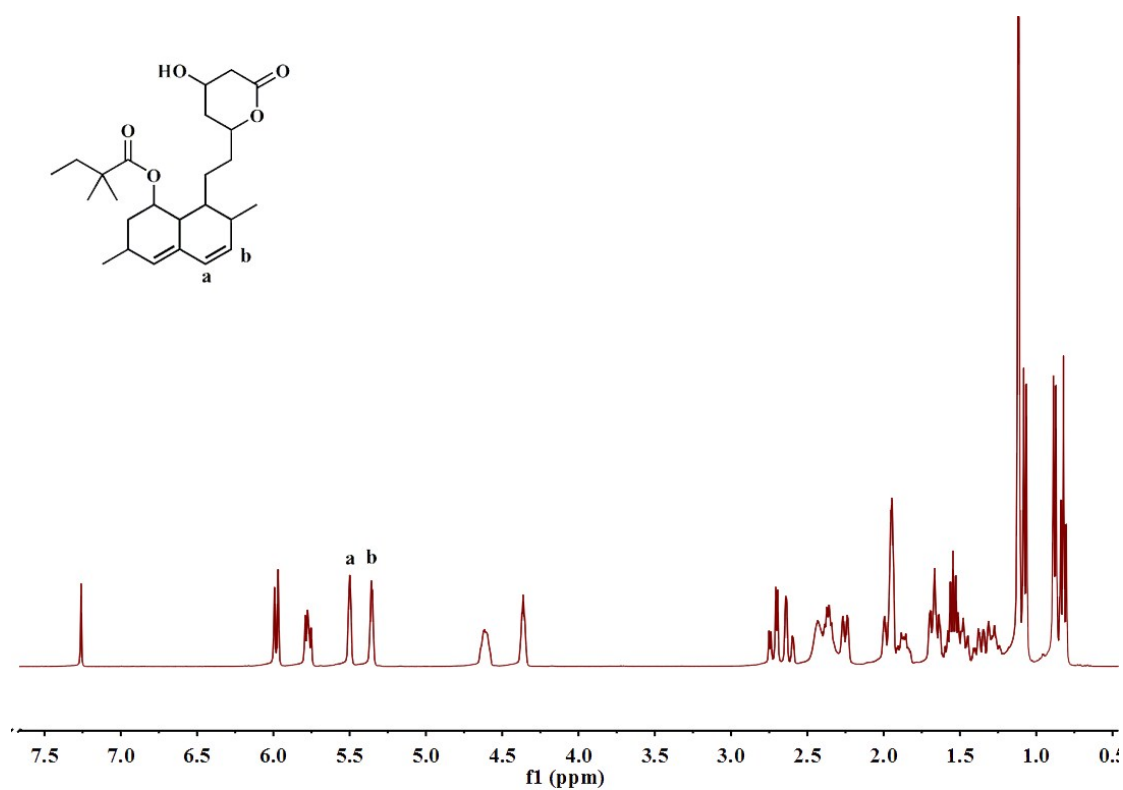

**Fig. S3.**  $^1\text{H}$  NMR spectrum of simvastatin (SIM).

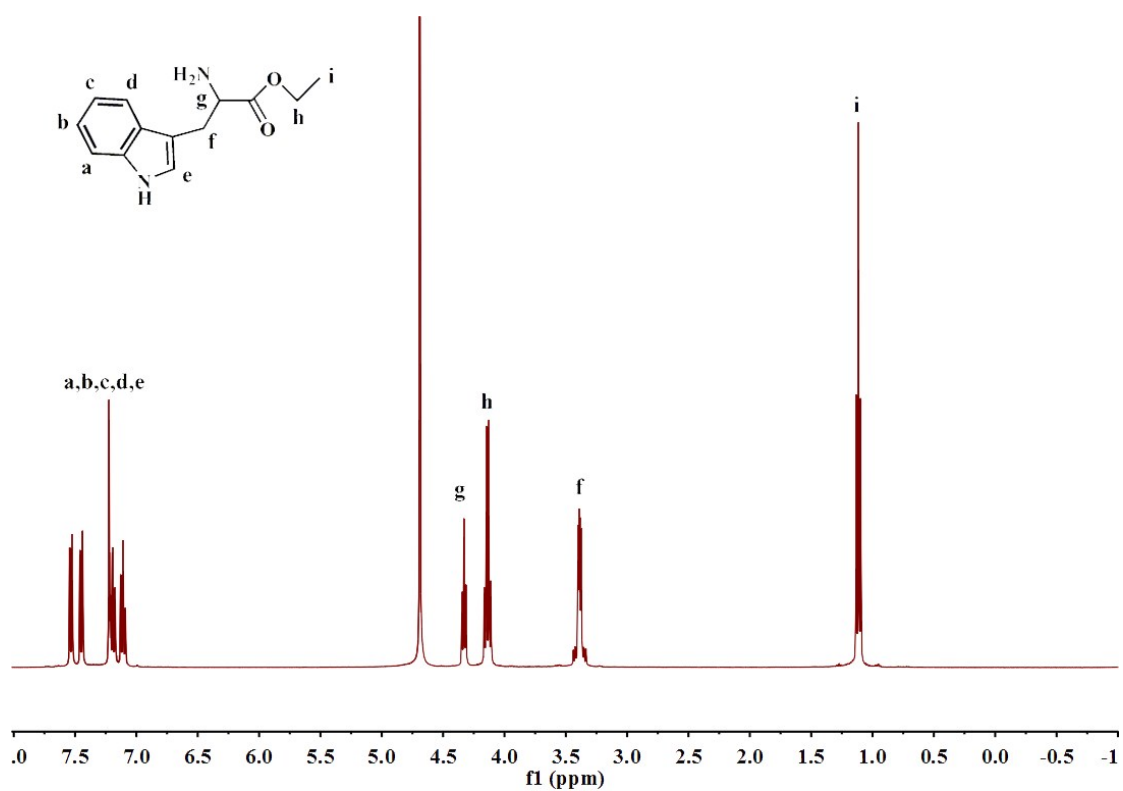

**Fig. S4.** <sup>1</sup>H NMR spectrum of L-tryptophan ethyl ester hydrochloride.

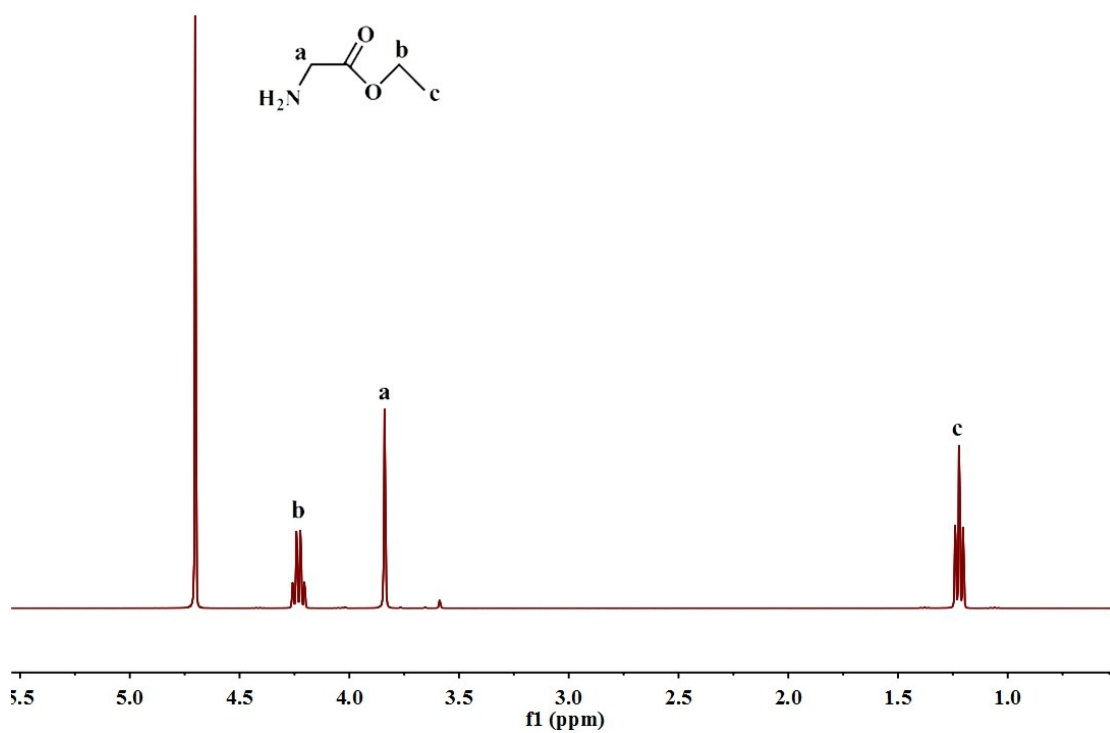

**Fig. S5.** <sup>1</sup>H NMR spectrum of L-glycine ethyl ester hydrochloride.

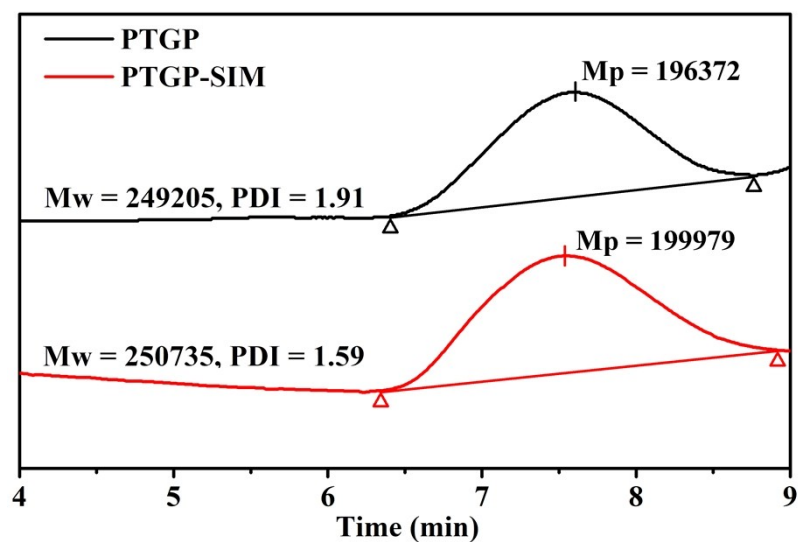

**Fig. S6.** Molecular weights and polydispersity (PDI) of PTGP-SIM and PTGP polymers determined by GPC. .

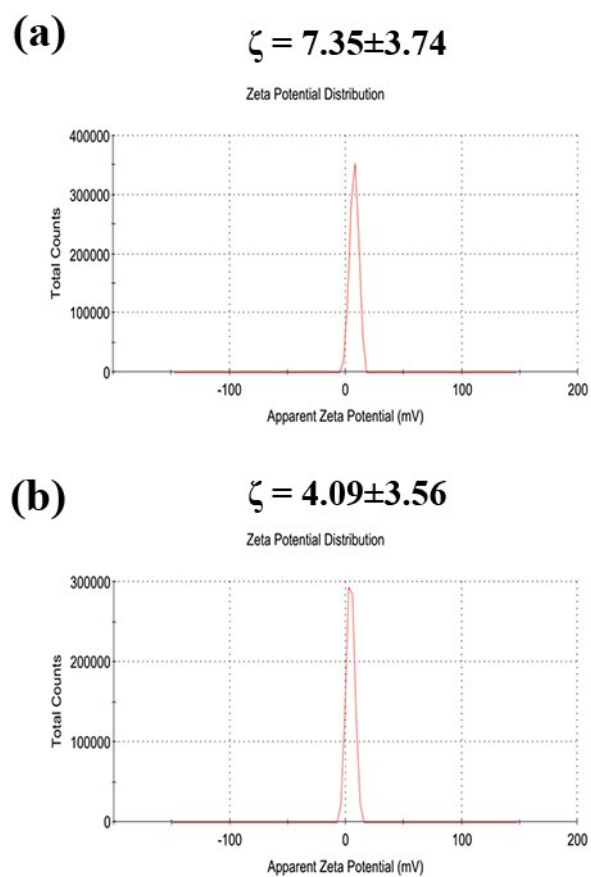

**Fig. S7.** Zeta potential measurements of (a) PTGP-SIM NPs and (b) PTGP NPs.

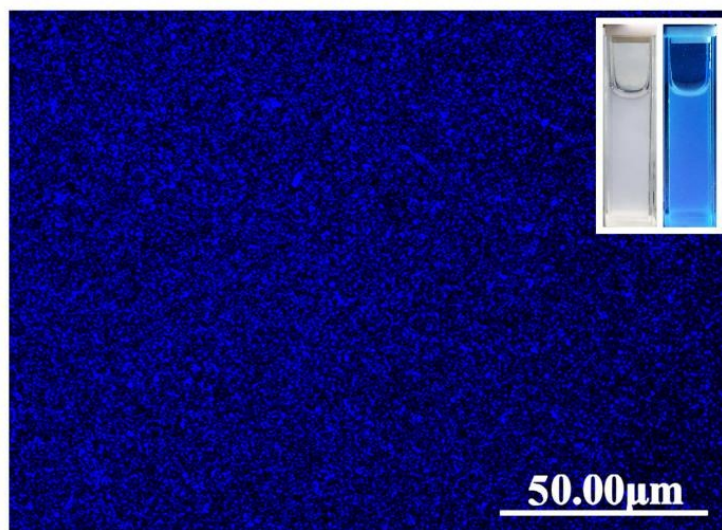

**Fig. S8.** LSCM image of PTGP-SIM NPs suspended in DI water under the excitation wavelength of 405 nm. Insets are appearances of PTGP-SIM NPs suspended in DI water observed under natural light (left) and 365 nm light (right).

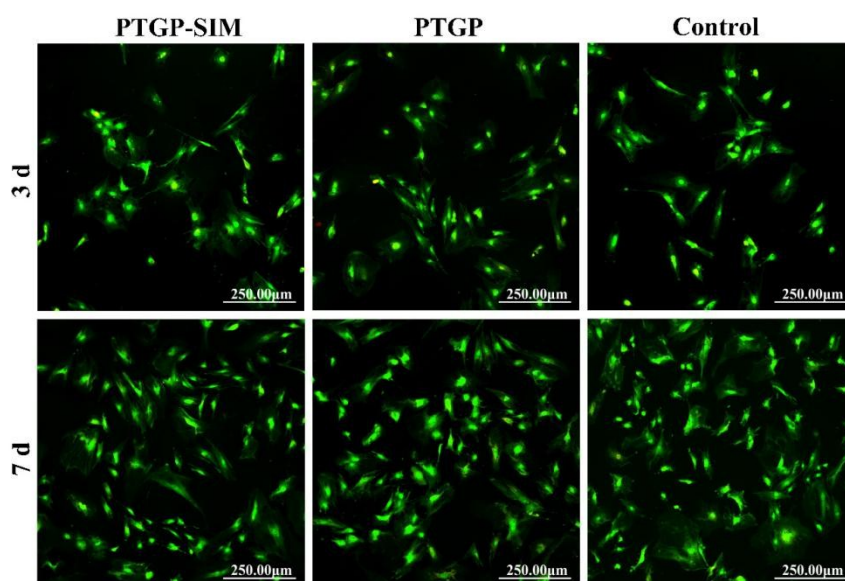

**Fig. S9.** Live/dead staining assay of BMSCs along with proliferation after being pre-treated with PTGP-SIM or PTGP NPs at the concentration of 0.04 g/L.

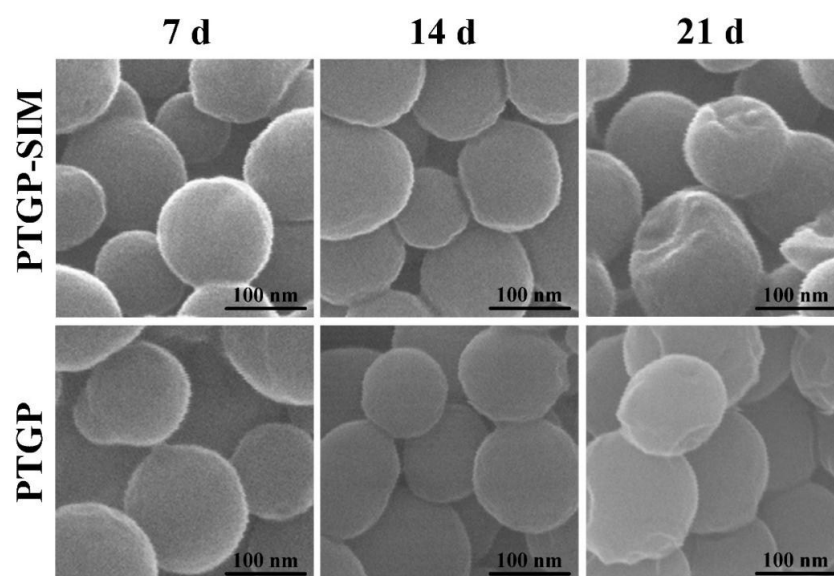

**Fig. S10.** Morphology changes of PTGP-SIM and PTGP NPs along with their degradation in PBS at 37°C for different periods.

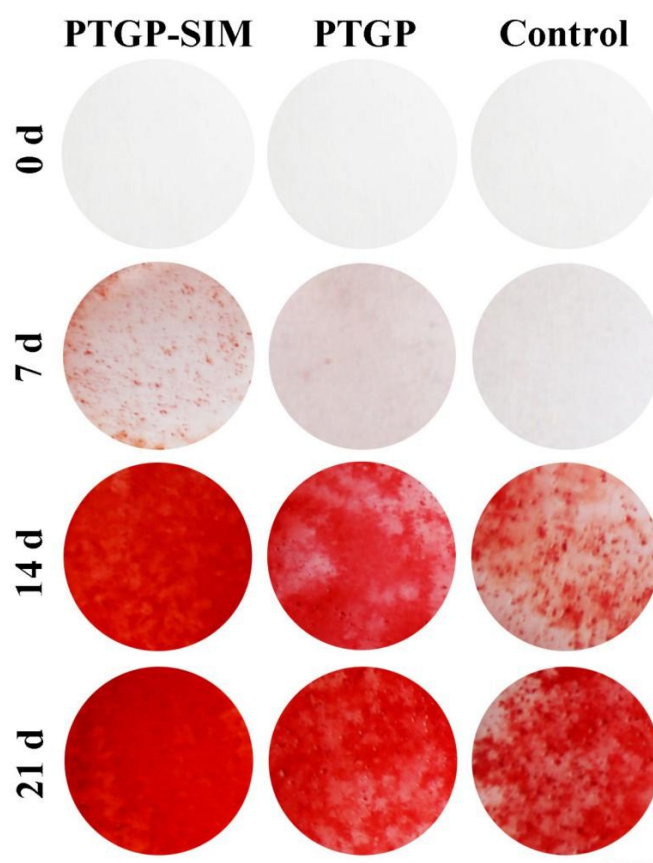

**Fig. S11.** Alizarin red staining for calcium deposition along with the osteogenic differentiation of BMSCs proceeding after the cells being treated with PTGP-SIM or PTGP NPs. Scale bar = 3 mm (taken by digital camera).

**Table S1.** The primers designed for selected genes relating to the osteogenic differentiation of BMSCs.

| gene symbol | forward primer (5'-3') | reverse primer (5'-3') |
|-------------|------------------------|------------------------|
| Runx2       | GCACCCAGCCCATAATAGA    | TTGGAGCAAGGAGAACCC     |
| BMP2        | GGAAAACTTCCCGACGCTTCT  | CCTGCATTTGTTCCCGAAAA   |
| OPN         | GAGGAAACCAGCCAAGGTAAG  | AAAGCAAATCACTGCCAATCTC |
| ALP         | AACGTGGCCAAGAACATCATCA | TGTCCATCTCCAGCCGTGTC   |
| OCN         | GGTGCAGACCTAGCAGACACCA | AGGTAGCGCCGGAGTCTATTCA |
| Col I       | GCCTCCCAGAACATCACCTA   | GCAGGGACTTCTTGAGGTTG   |
| 18s         | GTAACCCGTTGAACCCCAT    | CCATCCAATCGGTAGTAGCG   |
